# Supplementary material for: Lifestyle Habits and Mental Health in Light of the Two COVID-19 Pandemic Waves in Sweden, 2020
Source: Preprints.org preprint supplement (doi:10.20944/preprints202102.0435.v1), 2021-02-19
Supplement: Supplementary file 2 [file Appendix B.docx]

**Appendix B**

**Exercise habits
I exercise for the purpose of maintaining/improving my physical fitness, health and well-being ...**□ Never
□ Sometimes
□ 1-2 times/week
□ 3-5 times/week 6 times/week
□ At least 6 times/week

**Sitting in leisure time
I remain sedentary in my spare time…**□ All the time
□ 75% of the time
□ 50% of the time
□ 25% of the time
□ Almost no time

**Sitting at work
I remain sedentary at work…**□ All the time
□ 75% of the time
□ 50% of the time
□ 25% of the time
□ Almost no time

**Diet
I consider my diet, regarding both meal frequency and nutritional content to be ...**□ Very poor
□ Poor
□ Neither good or bad
□ Good
□ Very good

**Smoking habits
I smoke...**□ At least 20 cig/day
□ 11-19 cig/day
□ 1-10 cig/day
□ Occasionally
□ Never

**Overall stress
I perceive stress in my life, both personally and at work ...**□ Very often
□ Often
□ Sometime
□ Rarely
□ Never

**Perceived symptoms of anxiety and depression
I experience worry, sadness or anxiety ...**□ Very often
□ Often
□ Sometime
□ Rarely
□ Never

**Percieved health
I perceive my physical and mental health as...**□ Very poor
□ Poor
□ Neither good or bad
□ Good
□ Very good
