# Supplementary material for: Lifestyle Habits and Mental Health in Light of the Two COVID-19 Pandemic Waves in Sweden, 2020
Source: Preprints.org preprint supplement (doi:10.20944/preprints202102.0435.v1), 2021-02-19
Supplement: Supplementary file 3 [file Appendix Table A1.docx]

| **Appendix Table A1.** Participants with COVID-data and Health profile assessment data (n=5,599), and participants with only Health profile assessment data (n=6232) between April 21st 2020 and December 2nd 2021 | | | |
| --- | --- | --- | --- |
|  |  |  |  |
|  | HPA + COVID-19 data | Only HPA data | Difference p-value |
| n | 5,599 | 6,232 |  |
| Sex (women) | 50% | 33% | <0.001 |
| Age (year) | 46.3 (11.0) | 44.9 (11.6) | <0.001 |
| Estimated VO2max (ml/min/kg) | 36.0 (9.4) | 35.8 (10.0) | 0.518 |
| BMI (kg/m2) | 26.1 (4.5) | 26.7 (4.8) | <0.001 |
| Exercise habits (Never/irregular) | 24% | 27% | <0.001 |
| Sitting at work (All the time/75% of the time) | 45% | 30% | <0.001 |
| Sitting in leisure (All the time/75% of the time) | 10% | 9% | 0.101 |
| University degree | 35% | 23% | <0.001 |
| Occupation group (Blue collar) | 18% | 39% | <0.001 |
| Diet habits (Very poor/poor) | 4% | 4% | 0.060 |
| Alcohol abuse (AUDIT-C score > 4 women, > 5 men) | 35% | 33% | 0.017 |
| Daily smoker (≥ 1 cig/day) | 3% | 7% | <0.001 |
| Overall stress (Very often/often) | 13% | 11% | 0.001 |
| Perceived symptoms of anxiety and depression (Very often/often) | 9% | 7% | 0.002 |
| Data presented as mean (SD) or percentage |  |  |  |
