# Supplementary material for: Lifestyle Habits and Mental Health in Light of the Two COVID-19 Pandemic Waves in Sweden, 2020
Source: Preprints.org preprint supplement (doi:10.20944/preprints202102.0435.v1), 2021-02-19
Supplement: Supplementary file 4 [file Appendix Table A2.docx]

| **Appendix Table A2.** Characteristics of participants with COVID-data and/or Health profile assessment-data between April 21st and December 2nd in year 2020 (n=11,844) and participants with Health profile assessment-data during the same time period in year 2019 (n=20,864) | | | |
| --- | --- | --- | --- |
|  |  |  |  |
|  | HPA year 2019 | HPA year 2020 | Difference p-value |
| n | 20,864 | 11,844 |  |
| Sex (women) | 39% | 41% | 0.005 |
| Age (year) | 44.4 (11.8) | 45.6 (11.4) | <0.001 |
| Estimated VO2max (ml/min/kg) | 35.9 (9.8) | 35.9 (9.8) | 0.781 |
| BMI (kg/m2) | 26.4 (4.6) | 26.5 (4.7) | 0.021 |
| Exercise (Never/irregular) | 30% | 26% | <0.001 |
| Sitting at work (All the time/75% of the time) | 38% | 36% | <0.001 |
| Sitting in leisure (All the time/75% of the time) | 10% | 9% | 0.174 |
| University degree | 28% | 29% | 0.036 |
| Occupation group (Blue collar) | 31% | 29% | 0.003 |
| Diet (Very poor/poor) | 5% | 4% | <0.001 |
| Alcohol risk consumption (AUDIT-C score > 3 women, > 4 men) | 34% | 34% | 0.220 |
| Daily smoker (≥ 1 cig/day) | 7% | 6% | 0.003 |
| Overall stress (Very often/often) | 13% | 12% | 0.001 |
| Perceived symptoms of anxiety and depression  (Very often/often) | 8% | 8% | 0.623 |
| Data presented as mean (SD) or percentage |  |  |  |
