# Supplementary material for: Lifestyle Habits and Mental Health in Light of the Two COVID-19 Pandemic Waves in Sweden, 2020
Source: Preprints.org preprint supplement (doi:10.20944/preprints202102.0435.v1), 2021-02-19
Supplement: Supplementary file 5 [file Appendix Table A3.docx]

| **Appendix Table A3.** Odds ratio (95% CI) for change (no change as reference) in alcohol intake in relation to sex, age-group, educational level, occupation group, baseline levels and wave of COVID-19 | | | |
| --- | --- | --- | --- |
| **Alcohol intake** (n=2790) |  | Decreased | Increased |
| Women vs. Men |  | 0.70 (0.45-1.09) | 1.13 (0.83-1.53) |
| 18-59 years vs. 60-78 years |  | 2.31 (0.93-5.79) | 2.00 (1.13-3.57) |
| University vs. non-university |  | 1.09 (0.69-1.72) | 1.12 (0.82-1.53) |
| White collar vs. Blue collar |  | 2.16 (1.06-4.40) | 0.99 (0.66-1.48) |
| April-June vs. July-Sept |  | 2.22 (1.36-3.63) | 1.08 (0.76-1.55) |
| October-December vs. July-Sept |  | 0.94 (0.53-1.67) | 1.10 (0.79-1.54) |
| No alcohol risk consumption vs. Alcohol risk consumption |  | 0.16 (0.08-0.31) | 0.92 (0.68-1.23) |

Note: All analyses mutually adjusted for sex, age-group, educational level, occupational group, wave of COVID-19 and baseline value.
